# Supplementary material
Source: PubMed Central journal article supplement (PMC3255137)
Supplement: supp_110463_high-gronich-2-at.pdf [file supp_110463_high-gronich-2-at.pdf]

Appendix 2 (as submitted by authors): Multivariable analysis of venous (A) and arterial (B) thrombotic risk in third-generation combined oral contraceptive (COC) users compared with second-generation COC users. Rate ratio (RR) above 1.0 indicates increased risk. Second-generation COC users: *n* (number of thrombotic events) venous = 23, arterial = 41; *N* (woman-years of follow-up) venous = 33 187, arterial = 33 219; third-generation COC users: *n* (venous) = 384, *n* (arterial) = 382; *N* (venous) = 651 455, *N* (arterial) = 651 376. CI = confidence interval.

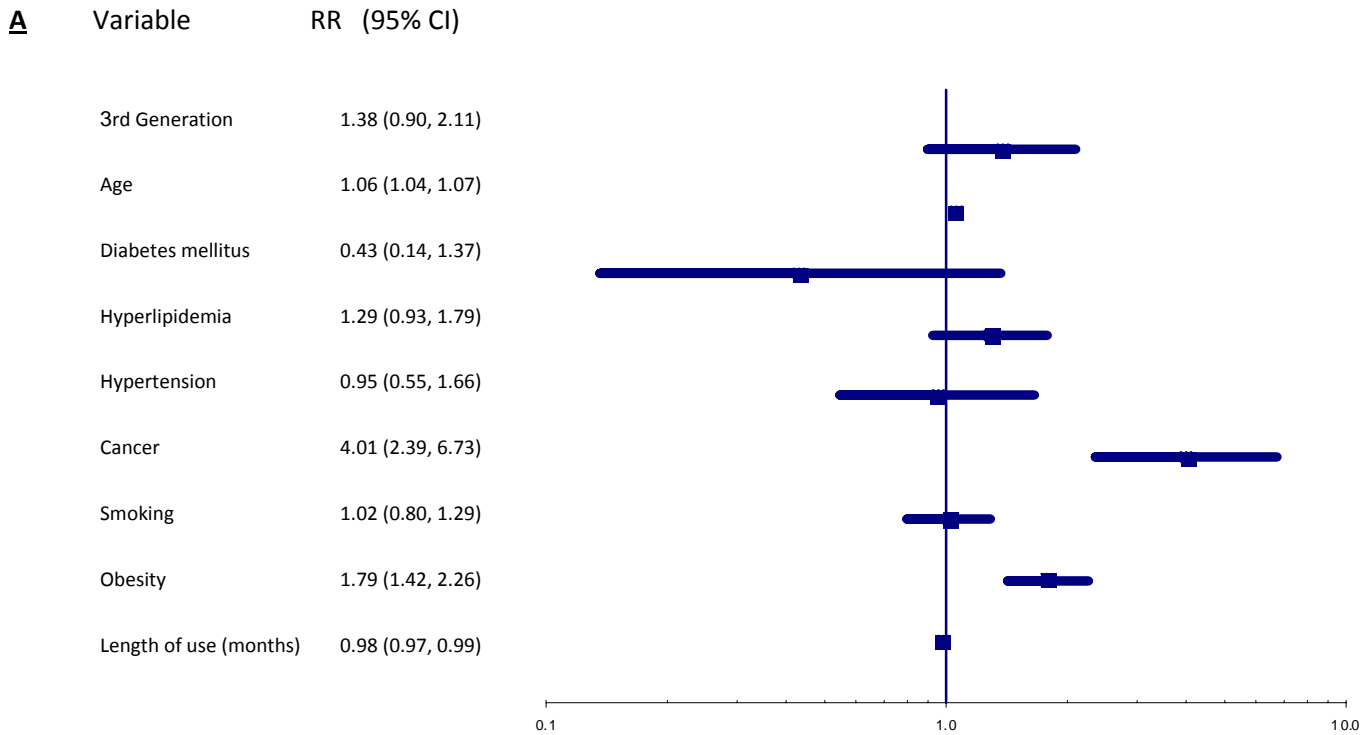

Appendix to Gronich N, Lavi I, Rennert G. Higher risk of venous thrombosis associated with drospirenone-containing oral contraceptives: a population-based cohort study. *CMAJ* 2011. DOI 10.1503/cmaj.110463.

Copyright © 2011 Canadian Medical Association or its licensors.

**B** Variable RR (95% CI)

|                        |                   |
|------------------------|-------------------|
| 3rd Generation         | 0.97 (0.70, 1.35) |
| Age                    | 1.08 (1.07, 1.10) |
| Diabetes mellitus      | 1.61 (0.94, 2.74) |
| Hyperlipidemia         | 1.29 (0.94, 1.76) |
| Hypertension           | 2.46 (1.74, 3.48) |
| Cancer                 | 1.48 (0.70, 3.15) |
| Smoking                | 1.26 (1.02, 1.57) |
| Obesity                | 1.45 (1.16, 1.81) |
| Length of use (months) | 0.97 (0.96, 0.98) |

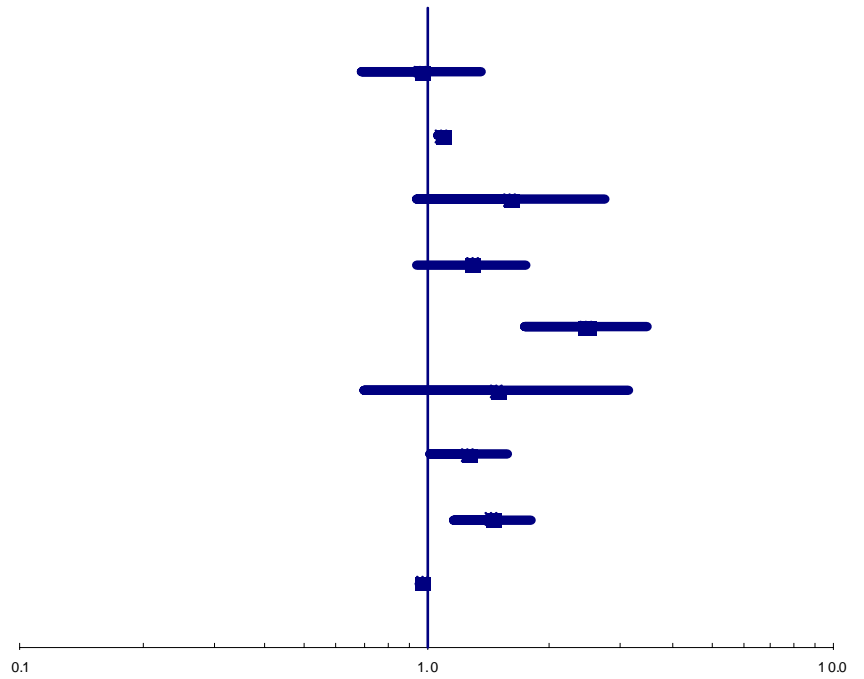

Appendix to Gronich N, Lavi I, Rennert G. Higher risk of venous thrombosis associated with drospirenone-containing oral contraceptives: a population-based cohort study. *CMAJ* 2011. DOI 10.1503/cmaj.110463.

Copyright © 2011 Canadian Medical Association or its licensors.
